# Supplementary material for: Time-Limited Therapy with Belatacept in Kidney Transplant Recipients
Source: MDPI journal article supplement (doi:10.3390/jcm11113229), 2022-06-06
Supplement: s1 [file s1]

**Supplemental Figure S1. Tacrolimus trough level after belatacept discontinuation (n = 25)** Each dot representing mean tacrolimus trough level at corresponding time point, and error bar standard deviation.

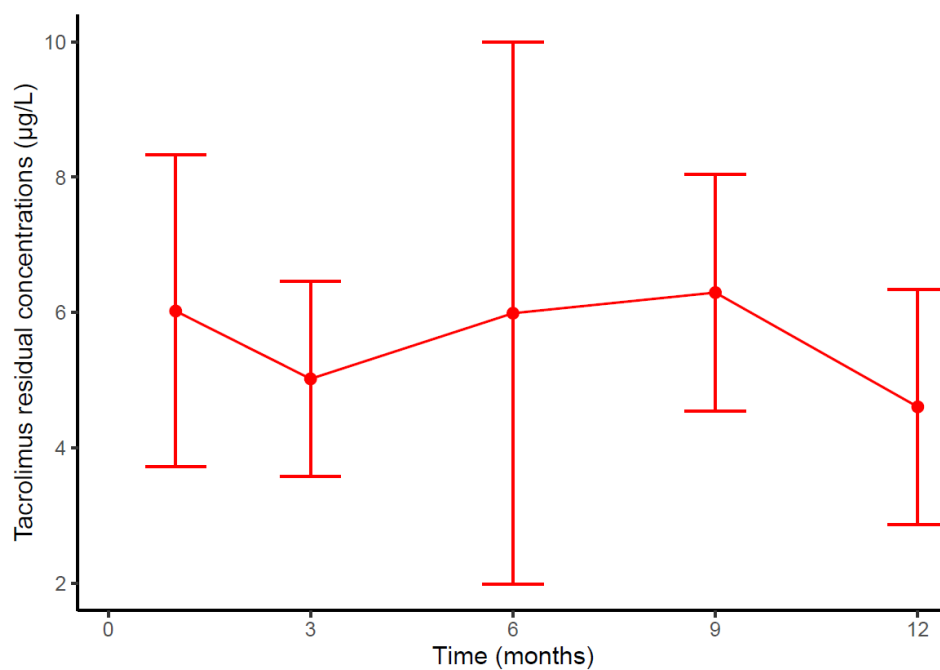

**Supplemental Table S1. Gene Ontology enrichment analysis (biological process) of Differential Expressed Genes between Day 0 and 3-months post belatacept withdrawal.**

| <b>Gene ontology (biological process) enrichment analysis of the 29 up-regulated DEGs</b>   |                                                                                |            |                  |            |                |
|---------------------------------------------------------------------------------------------|--------------------------------------------------------------------------------|------------|------------------|------------|----------------|
| Index                                                                                       | Gene Ontology Term                                                             | P-value    | Adjusted p-value | Odds Ratio | Combined score |
| 1                                                                                           | regulation of respiratory burst involved in inflammatory response (GO:0060264) | 0.005986   | 0.04995          | 217.09     | 1111.12        |
| 2                                                                                           | regulation of lyase activity (GO:0051339)                                      | 0.005986   | 0.04995          | 217.09     | 1111.12        |
| 3                                                                                           | negative regulation of T cell receptor signaling pathway (GO:0050860)          | 0.0002331  | 0.005657         | 106.73     | 892.73         |
| 4                                                                                           | mitochondrial electron transport, NADH to ubiquinone (GO:0006120)              | 0.00001349 | 0.001200         | 79.13      | 887.32         |
| 5                                                                                           | macromolecule biosynthetic process (GO:0009059)                                | 0.007179   | 0.05726          | 173.66     | 857.29         |
| <b>Gene ontology (biological process) enrichment analysis of the 40 down-regulated DEGs</b> |                                                                                |            |                  |            |                |
| Index                                                                                       | Gene Ontology Term                                                             | P-value    | Adjusted p-value | Odds Ratio | Combined score |
| 1                                                                                           | negative regulation of leukocyte degranulation (GO:0043301)                    | 0.0001535  | 0.007843         | 142.51     | 1251.43        |
| 2                                                                                           | SRP-dependent cotranslational protein targeting to membrane (GO:0006614)       | 3.229e-8   | 0.00001286       | 39.43      | 680.15         |
| 3                                                                                           | cotranslational protein targeting to membrane (GO:0006613)                     | 4.197e-8   | 0.00001286       | 37.63      | 639.24         |
| 4                                                                                           | protein targeting to ER (GO:0045047)                                           | 7.268e-8   | 0.00001485       | 34.13      | 560.93         |
| 5                                                                                           | positive regulation of amine transport (GO:0051954)                            | 0.01046    | 0.1002           | 121.67     | 554.88         |
